# Supplementary figures and images for: Abnormal retinal capillary blood flow in autosomal dominant Alzheimer's disease
Source: PubMed Central journal article supplement — Alzheimers Dement (Amst). 2021 Mar 4;13(1):e12162. doi: 10.1002/dad2.12162 (PMC7931411; doi:10.1002/dad2.12162), 2021-03-04

# Capillary Blood Flow vs. Adjusted Age

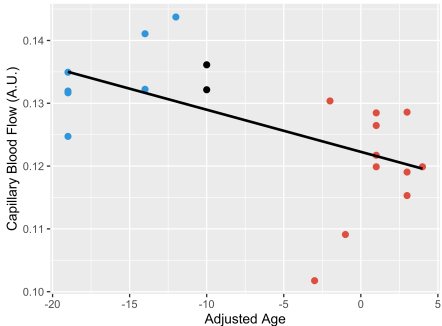

Supplement: DAD2-13-e12162-s001.pdf [file DAD2-13-e12162-s001.pdf]
